# Supplementary material
Source: PubMed Central journal article supplement (PMC2568850)

**What do they want? a content analysis of Medical Library Association reference job  
announcements, 2000–2005**

**Lin Wu, MLIS, AHIP; Ping Li, PhD**

---

**Figure 1**

*MLA News* job advertisements by year, 2000–2005

---

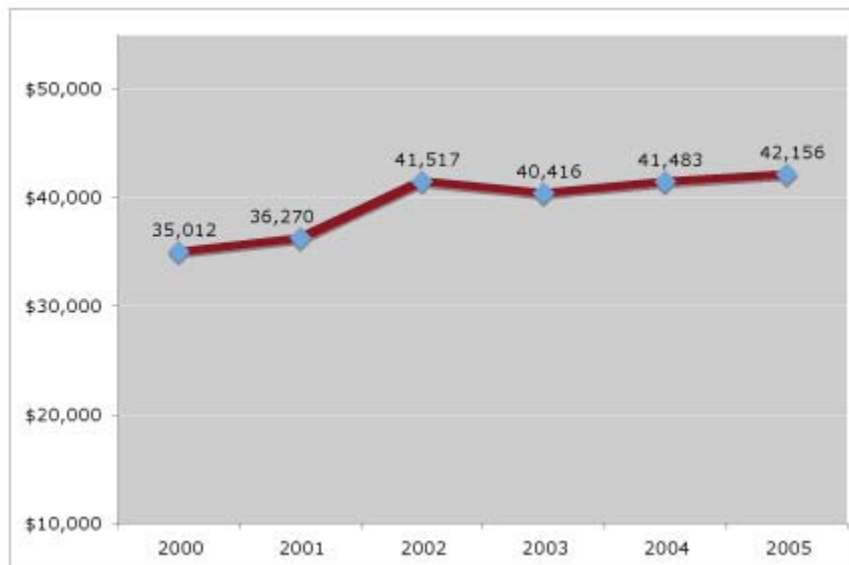

Supplement: 10.3163.1536-5050.96.4.015.sg002.pdf [file 10.3163.1536-5050.96.4.015.sg002.pdf]
