# Supplementary material
Source: PubMed Central journal article supplement (PMC2568850)
Supplement: 10.3163.1536-5050.96.4.015.sg004.pdf [file 10.3163.1536-5050.96.4.015.sg004.pdf]

**What do they want? a content analysis of Medical Library Association reference job  
announcements, 2000–2005**

**Lin Wu, MLIS, AHIP; Ping Li, PhD**

---

**Table 1**  
Geographic distribution of reference positions\* (n=247)

---

| <b>Region</b>                | <b>Number</b> | <b>Percentage</b> |
|------------------------------|---------------|-------------------|
| New England Region           | 19            | 8                 |
| Middle Atlantic Region       | 30            | 12                |
| Southeastern/Atlantic Region | 73            | 30                |
| Greater Midwest Region       | 47            | 19                |
| Mid-Continental Region       | 7             | 3                 |
| Pacific Northwest Region     | 5             | 2                 |
| Pacific Southwest Region     | 31            | 13                |
| South Central Region         | 21            | 9                 |
| Other regions†               | 14            | 6                 |

---

\* Percentages do not total 100%, as the content of the each job description could apply to multiple variables.

† Includes job advertisements from non-US areas.

---
