# Supplementary material
Source: PubMed Central journal article supplement (PMC2568850)
Supplement: 10.3163.1536-5050.96.4.015.sg005.pdf [file 10.3163.1536-5050.96.4.015.sg005.pdf]

**What do they want? a content analysis of Medical Library Association reference job  
announcements, 2000–2005**

**Lin Wu, MLIS, AHIP; Ping Li, PhD**

**Table 3**  
Requirements listed in job advertisements\*

| <b>Variables</b>                                                                      | <b>Number</b> | <b>Percentage</b> |
|---------------------------------------------------------------------------------------|---------------|-------------------|
| <b>Instruction-related requirements</b>                                               |               |                   |
| User instruction                                                                      | 134           | 54                |
| Informatics, information literacy, and information management training or teaching    | 31            | 13                |
| Development of course content or curriculum                                           | 26            | 11                |
| Development of online tutorials or instructional guides or materials                  | 26            | 11                |
| Course-integrated instruction                                                         | 22            | 9                 |
| Coordination of educational resources and service programs                            | 20            | 8                 |
| Orientation and bibliographic instruction                                             | 19            | 8                 |
| Staff training                                                                        | 15            | 6                 |
| Evaluation of instructional programs                                                  | 9             | 4                 |
| Planning, implementation, and coordination of continuing medical education activities | 8             | 3                 |
| Training or teaching of local health care professionals                               | 7             | 3                 |
| <b>Reference assistance-related requirements</b>                                      |               |                   |
| Research assistance or consultation                                                   | 110           | 45                |
| Online database searching                                                             | 87            | 35                |
| Reference desk services                                                               | 33            | 13                |
| Web page content development                                                          | 24            | 10                |
| Exploration of innovative and creative services                                       | 19            | 8                 |
| Virtual reference services                                                            | 17            | 7                 |
| Interlibrary loan or document delivery                                                | 17            | 7                 |
| <b>Technology-related requirements</b>                                                |               |                   |
| Basic writing, editing, and presentation-related technology                           | 67            | 27                |
| Experience with network, the Internet, and intranets                                  | 58            | 23                |
| Website or web page development or maintenance                                        | 42            | 17                |
| Knowledge or experience with automated or electronic information systems              | 21            | 9                 |
| Technology support for electronic systems                                             | 4             | 2                 |

**Leadership and management-related requirements**

|                                                                                |    |    |
|--------------------------------------------------------------------------------|----|----|
| Managing the daily operation of the library or information services            | 34 | 14 |
| Supervising staff                                                              | 33 | 13 |
| Marketing                                                                      | 26 | 11 |
| Planning, developing, and implementing innovative services                     | 16 | 6  |
| Preparing library budget                                                       | 12 | 5  |
| Developing plans, policies, and procedures                                     | 13 | 5  |
| Providing leadership on special projects or information services               | 11 | 4  |
| Being aware of issues and trends in information technology and public services | 5  | 2  |

---

\* Percentages do not total 100%, as the content of the each job description could apply to multiple variables.

---
