# Supplementary material
Source: PubMed Central journal article supplement (PMC2568850)
Supplement: 10.3163.1536-5050.96.4.015.sg006.pdf [file 10.3163.1536-5050.96.4.015.sg006.pdf]

**What do they want? a content analysis of Medical Library Association reference job  
announcements, 2000–2005**

**Lin Wu, MLIS, AHIP; Ping Li, PhD**

---

**Table 4**  
Top five skills requested\*

---

| <b>Variables</b>                      | <b>Number</b> | <b>Percentage</b> |
|---------------------------------------|---------------|-------------------|
| Oral and written communication skills | 105           | 43                |
| Interpersonal skills                  | 68            | 28                |
| Teaching skills                       | 67            | 27                |
| Online searching skills               | 61            | 25                |
| Customer service skills               | 53            | 21                |

---

\* Percentages do not total 100%, as the content of the each job description could apply to multiple variables.

---
